# Supplementary material for: Enhanced dispersive solid phase extraction assisted by cloud point strategy prior to fluorometric determination of anti-hepatitis C drug velpatasvir in pharmaceutical tablets and body fluids
Source: Royal Society of Chemistry journal article supplement (doi:10.1039/c7ra13719b), 2018-01-01
Supplement: c7ra13719b1.pdf [file c7ra13719b1.pdf]

## **Supplementary information**

### **Enhanced solid phase extraction synergistically assisted by cloud point strategy prior to the determination of a recently FDA approved anti-hepatitis C drug velpatasvir: Application in Biological Fluids**

Mohamed M. El-Wakil<sup>\*1</sup>, Hassan Refat H. Ali<sup>1</sup>, Adel A. Marzouk<sup>2</sup>,

Ramadan Ali<sup>3</sup>

<sup>1</sup> Department of Pharmaceutical Analytical Chemistry, Faculty of Pharmacy, Assiut University, Assiut, Egypt.

<sup>2</sup> Department of Pharmaceutical Chemistry, Faculty of Pharmacy, Al Azhar University, Assiut, Egypt.

<sup>3</sup> Department of Pharmaceutical Analytical Chemistry, Faculty of Pharmacy, Al Azhar University, Assiut, Egypt.

\* Corresponding author: mohamed.mohamoud@ymail.com

## Figures

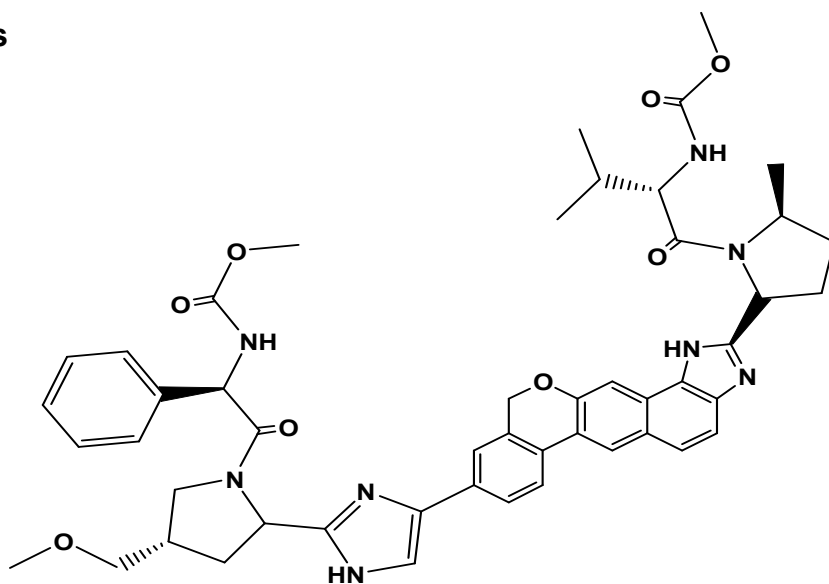

**Fig.1S:** The chemical structure of VELP.

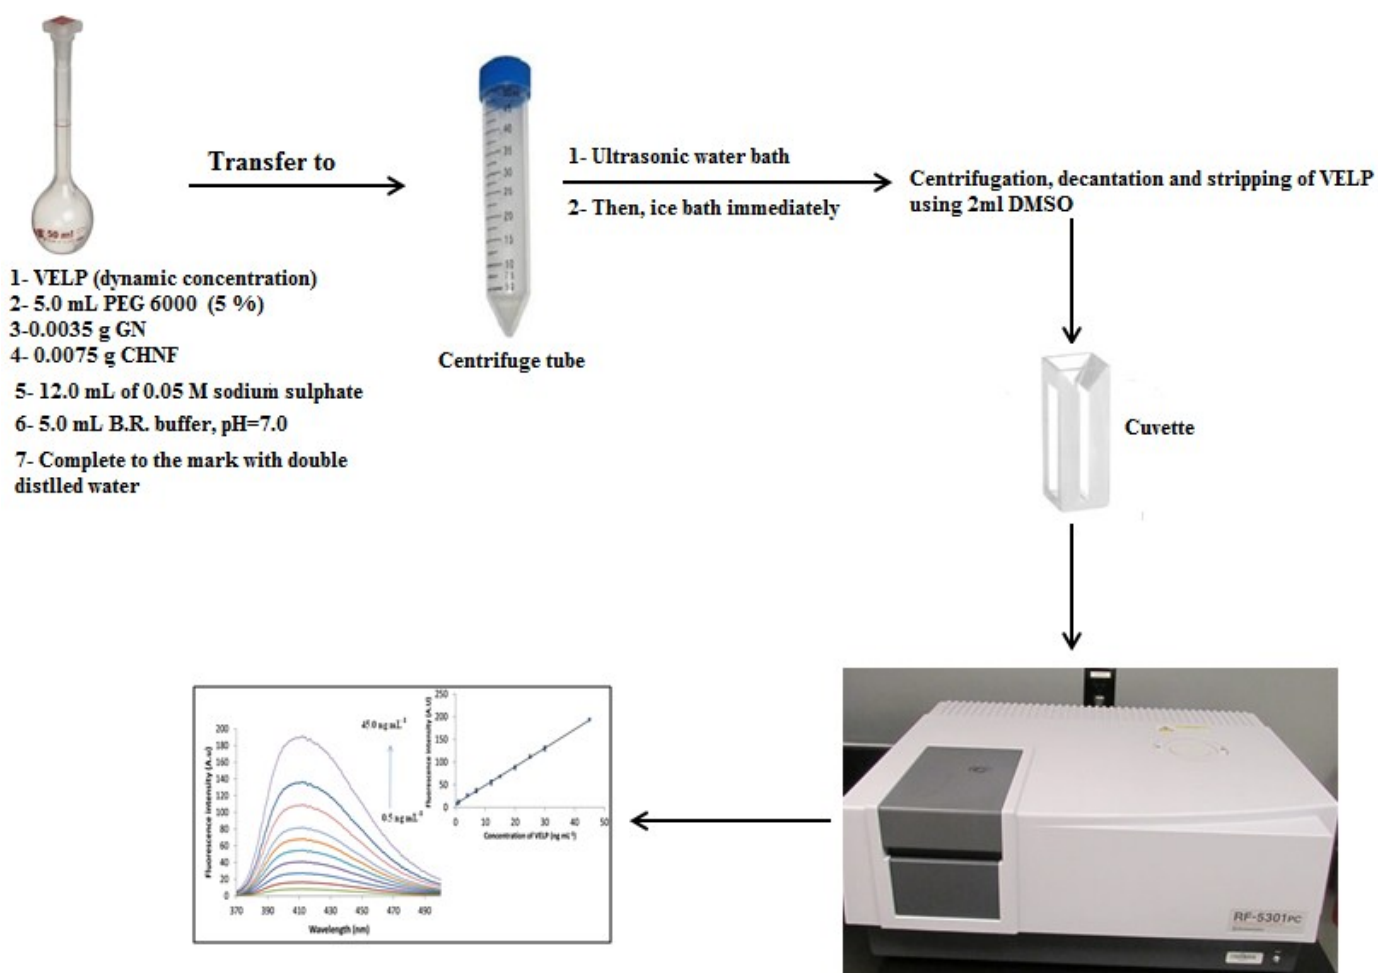

**Fig.2S:** Graphical representation of the proposed analytical procedure.

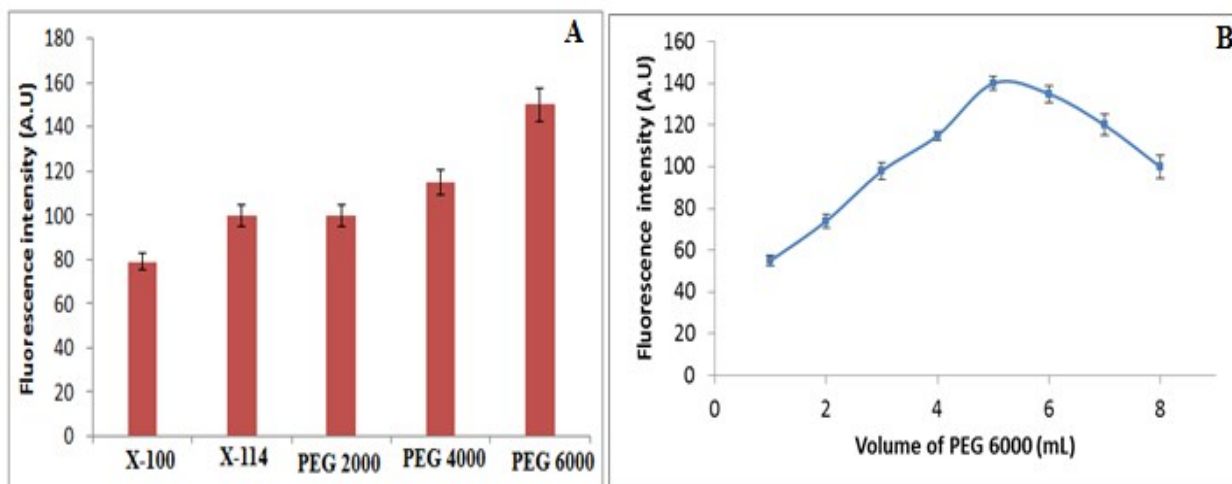

**Fig. 3S:** (A) The influence of surfactant type and (B) Influence of different volumes of PGE 6000 on fluorescence intensity of 30 ng/ml of VELP.

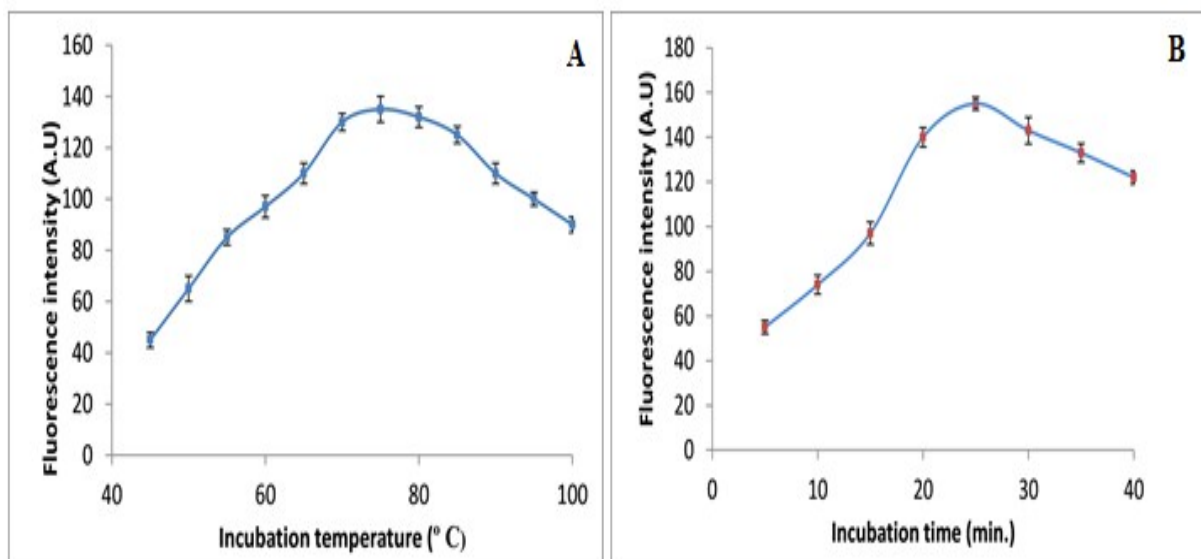

**Fig. 4S:** (A) The influence of incubation temperature and (B) Influence of incubation time on fluorescence intensity of 30 ng/ml of VELP.

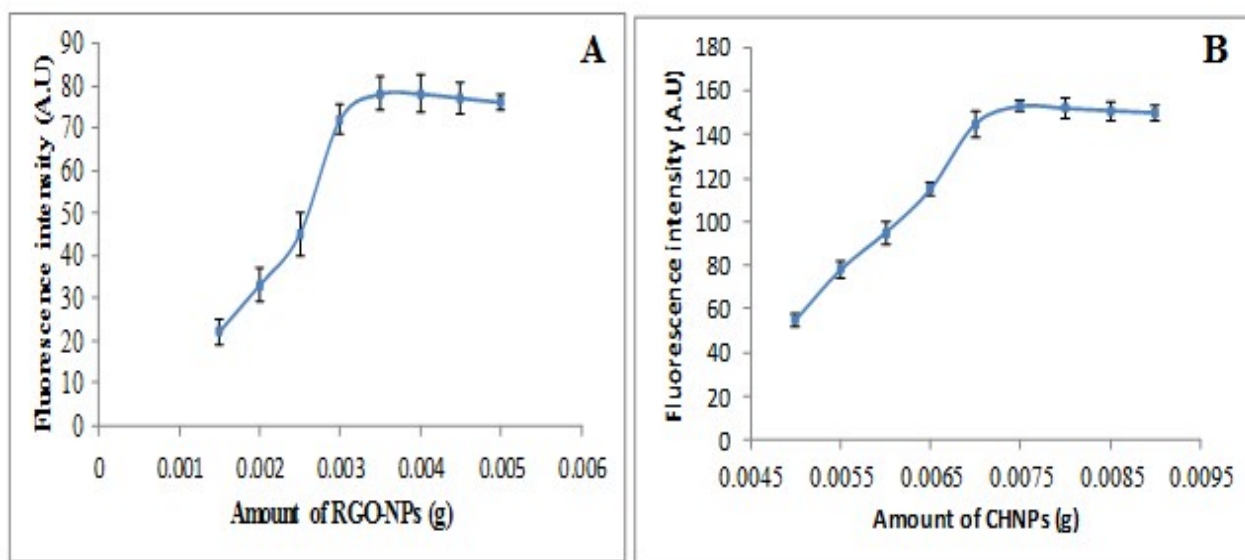

**Fig. 5S:** (A) The influence of RGO-NPs amount using 0.0075 g CHNPs while (B) The influence of CHNPs amount using 0.0035 g of RGO-NPs on fluorescence intensity of 30 ng/ml of VELP.

## Tables

**Table 1S.** The precision of the proposed method for determination of VELP.

| Concentration of VELP<br>(ng mL <sup>-1</sup> ) | Inter-day precision |       | Intra-day precision |       |
|-------------------------------------------------|---------------------|-------|---------------------|-------|
|                                                 | % Recovery± SD*     | % RSD | % Recovery± SD*     | % RSD |
| 10                                              | 99.5±1.8            | 1.81  | 100.9±2.6           | 2.57  |
| 20                                              | 100.3±2.5           | 2.49  | 97.8± 1.7           | 1.73  |
| 30                                              | 98.8±1.9            | 1.92  | 102.3±2.0           | 1.96  |

\* Average of five replicates.

**Table 2S.** Recovery study for determination of VELP in tablets by standard addition method.

| Amount taken<br>(ng mL <sup>-1</sup> ) | Amount of<br>standard added<br>(ng mL <sup>-1</sup> ) | Amount found<br>(ng mL <sup>-1</sup> ) | % Recovery $\pm$ SD* | % RSD |
|----------------------------------------|-------------------------------------------------------|----------------------------------------|----------------------|-------|
| 5                                      | 2                                                     | 1.98                                   | 99.0 $\pm$ 1.7       | 1.72  |
|                                        | 5                                                     | 4.98                                   | 99.6 $\pm$ 2.2       | 2.20  |
|                                        | 10                                                    | 10.15                                  | 101.5 $\pm$ 1.8      | 1.77  |
|                                        | 15                                                    | 15.08                                  | 100.5 $\pm$ 2.4      | 2.38  |
|                                        | 20                                                    | 19.88                                  | 99.4 $\pm$ 1.5       | 1.51  |
|                                        | 25                                                    | 24.55                                  | 98.2 $\pm$ 1.8       | 1.83  |

\* Average of five replicates.



**Table 3S.** The robustness of the proposed method.

| Variables                   | % recovery ( $\pm$ SD*) | RSD  |
|-----------------------------|-------------------------|------|
| No variation                | 99.7 $\pm$ 2.1          | 2.11 |
| pH                          |                         |      |
| 6.0                         | 98.2 $\pm$ 2.0          | 2.04 |
| 8.0                         | 98.7 $\pm$ 2.3          | 2.33 |
| Volume of surfactant (mL)   |                         |      |
| 4.5                         | 99.7 $\pm$ 2.1          | 2.11 |
| 5.5                         | 99.5 $\pm$ 1.8          | 1.81 |
| Amount of RGO-NPs (g)       |                         |      |
| 0.003                       | 100.2 $\pm$ 2.3         | 2.29 |
| 0.004                       | 99.8 $\pm$ 1.7          | 1.70 |
| Amount of CHNPs (g)         |                         |      |
| 0.007                       | 97.6 $\pm$ 2.5          | 2.56 |
| 0.008                       | 97.2 $\pm$ 1.9          | 1.95 |
| Incubation temperature (°C) |                         |      |
| 70                          | 100.8 $\pm$ 2.4         | 2.38 |
| 80                          | 97.5 $\pm$ 2.7          | 2.77 |
| Incubation time (min.)      |                         |      |
| 23                          | 99.7 $\pm$ 2.6          | 2.61 |
| 27                          | 101.3 $\pm$ 2.0         | 1.97 |

\* Average of six replicates.
